# Supplementary material for: Clinical Applications of Dual-Energy CT
Source: PubMed Central journal article supplement — Korean J Radiol. 2021 Apr 1;22(6):970–82. doi: 10.3348/kjr.2020.0996 (PMC8154785; doi:10.3348/kjr.2020.0996), 2021-04-01
Supplement: kjr-22-970-s001.pdf [file kjr-22-970-s001.pdf]

## SUPPLEMENT

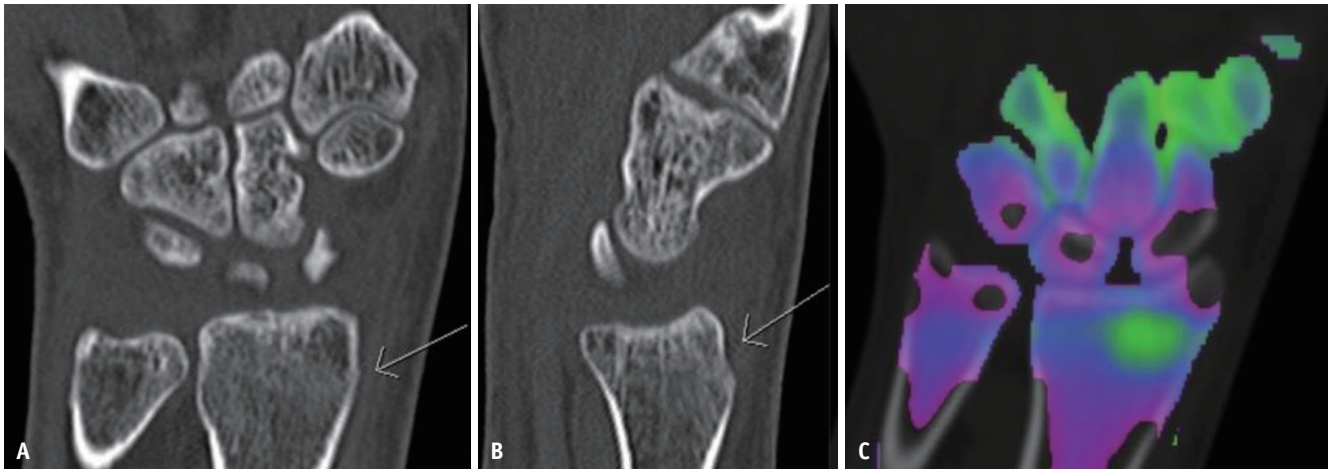

**Supplementary Fig. 1. A 30-year-old female with a history of a fall on an outstretched hand.**

**A, B.** Coronal and sagittal CT images of the wrist show a questionable cortical irregularity (arrows) at the dorsal cortex of the distal radius.  
**C.** Dual-energy CT image with color-coding highlights the marrow edema, with green color-coding corresponding to the area of cortical irregularity, confirming a subtle, nondisplaced buckle fracture of the dorsal aspect of the distal radial metaphysis.
