# Supplementary material for: Clinical Applications of Dual-Energy CT
Source: PubMed Central journal article supplement — Korean J Radiol. 2021 Apr 1;22(6):970–82. doi: 10.3348/kjr.2020.0996 (PMC8154785; doi:10.3348/kjr.2020.0996), 2021-04-01
Supplement: kjr-22-970-s002.pdf [file kjr-22-970-s002.pdf]

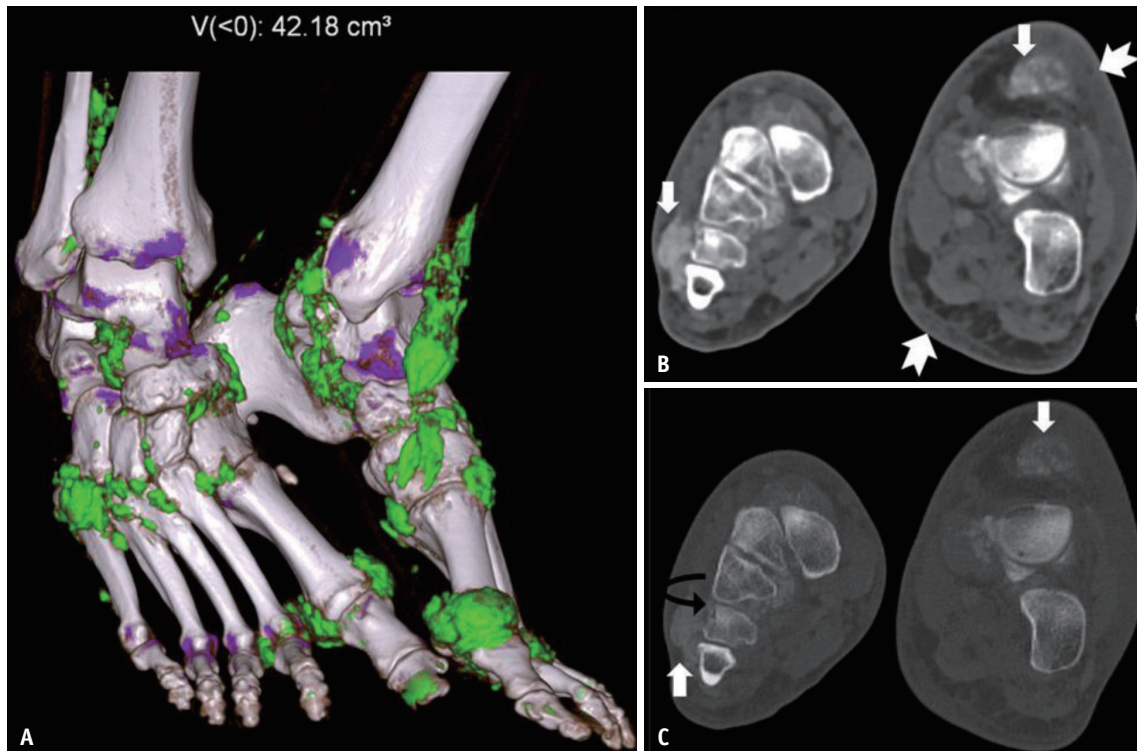

**Supplementary Fig. 2. A 62-year-old male with gout.**

**A-C.** Dual-energy CT three-dimensional reformatted image **(A)** analysis displays extensive green color-coded MSU deposits consistent with advanced uric acid burden; the MSU deposits were markedly seen in the multiple flexor tendons, the right Achilles tendon, bilateral tarsometatarsal joints, and the bilateral first and second metatarsal joint. Axial soft tissue CT of the foot **(B)** shows extensive soft-tissue mineralization, consistent with uric acid deposit, with diffuse subcutaneous soft-tissue thickening and swelling (notched arrows); **(C)** the bone window images show associated pressure erosions (arrows) at the sites of the deposit (black curved arrow) as well as MSU (arrows). CT = computed tomography, MSU = monosodium urate deposition
