# Supplementary material for: Clinical Applications of Dual-Energy CT
Source: PubMed Central journal article supplement — Korean J Radiol. 2021 Apr 1;22(6):970–82. doi: 10.3348/kjr.2020.0996 (PMC8154785; doi:10.3348/kjr.2020.0996), 2021-04-01
Supplement: kjr-22-970-s003.pdf [file kjr-22-970-s003.pdf]

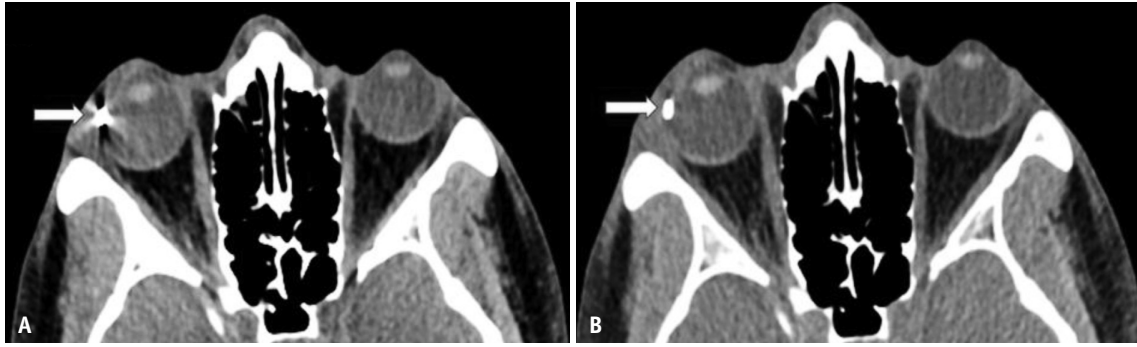

**Supplementary Fig. 3. A 36-year-old male with a foreign body along the lateral aspect of the right globe.**

**A.** Axial dual-energy CT image of the head acquired at 80 kV shows a metallic foreign body associated with high-density streak artifact obscuring the surrounding anatomical details (arrow). **B.** In the 150 kV image, the streak artifacts are markedly reduced with superior surrounding anatomical delineation (arrow).
